1 Structural diversity across arbuscular mycorrhizal,  
2 ectomycorrhizal, and endophytic plant–fungus networks

3

4 Hirokazu Toju<sup>1,2\*</sup>, Hirotohi Sato<sup>3</sup>, Satoshi Yamamoto<sup>4</sup>, Akifumi S. Tanabe<sup>5</sup>

5

6 \*Correspondence: [toju.hirokazu.4c@kyoto-u.ac.jp](mailto:toju.hirokazu.4c@kyoto-u.ac.jp)

7 <sup>1</sup>Center for Ecological Research, Kyoto University, Otsu, Shiga 520-2113, Japan

8 <sup>2</sup>Precursory Research for Embryonic Science and Technology (PRESTO), Japan Science and  
9 Technology Agency, Kawaguchi, Saitama 332-0012, Japan

10 <sup>3</sup>Graduate School of Human and Environmental Studies, Kyoto University, Sakyo, Kyoto  
11 606-8501, Japan

12 <sup>4</sup>Graduate School of Science, Kyoto University, Kitashirakawa-oiwake-cho, Kyoto 606-8502,  
13 Japan

14 <sup>5</sup>Faculty of Science and Technology, Ryukoku University, 1-5 Yokotani, Seta Oe-cho, Otsu,  
15 Shiga 520-2194, Japan

16

17 This article includes 7 Additional files (Data S1-7).

18

## 19 **Abstract**

20 **Background:** Below-ground linkage between plant and fungal communities is one of the  
21 major drivers of terrestrial ecosystem dynamics. However, we still have limited knowledge of  
22 how such plant–fungus associations vary in their community-scale properties depending on  
23 fungal functional groups and geographic locations.

24 **Methods:** Based on high-throughput sequencing of root-associated fungi in forest ecosystems,  
25 we performed a comparative analysis of arbuscular mycorrhizal, ectomycorrhizal, and  
26 saprotrophic/endophytic associations across a latitudinal gradient from cool-temperate to  
27 subtropical regions.

28 **Results:** In most of the plant–fungus networks analyzed, host–symbiont associations were  
29 significantly specialized but lacked “nested” architecture, which has been commonly reported  
30 in plant–pollinator and plant–seed disperser networks. Meanwhile, the structure of arbuscular  
31 mycorrhizal networks was differentiated from that of ectomycorrhizal and  
32 saprotrophic/endophytic networks, characterized by high connectance. Our data also  
33 suggested that geographic factors affected the organization of plant–fungus network structure.  
34 For example, the southernmost subtropical site analyzed in this study displayed lower  
35 network-level specificity of host–symbiont associations and higher (but still low) nestedness  
36 than northern localities.

37 **Conclusions:** Our comparative analyses suggest that arbuscular mycorrhizal, ectomycorrhizal,  
38 and saprotrophic/endophytic plant–fungus associations often lack nested network architecture,  
39 while those associations can vary, to some extent, in their community-scale properties along a  
40 latitudinal gradient. Overall, this study provides a basis for future studies that will examine  
41 how different types of plant–fungus associations collectively structure terrestrial ecosystems.

42 **Keywords:** biodiversity; community ecology; competitive exclusion; host specificity or  
43 preference; latitudinal gradients; microbiomes; plant–fungus interactions; plant–soil feedback;  
44 species coexistence; mycorrhizal and endophytic symbiosis

45

## 46 **Background**

47 Fungi in the below-ground biosphere are key drivers of terrestrial ecosystem processes [1-4].  
48 Mycorrhizal fungi are considered to support land plants not only by provisioning soil nitrogen  
49 and phosphorous [5, 6] but also by increasing plants' resistance to biotic/abiotic stress [7, 8].  
50 Pathogenic fungi in the soil affect the survival/mortality of young plants in a major way,  
51 possibly determining spatial distributions of plant species within forest/grassland ecosystems  
52 [9, 10]. Moreover, recent mycological studies have begun to examine the poorly explored  
53 diversity of endophytic fungi, which can enhance the nutritional conditions and pathogen  
54 resistance of mycorrhizal and non-mycorrhizal plant species [11-14]. Thus, terrestrial biomes  
55 consist of multiple layers of below-ground plant–fungus interactions [15]. Nonetheless, we  
56 still have limited knowledge of the structure of such complex webs of interactions, leaving  
57 major processes in below-ground ecosystems poorly explored.

58 In enhancing our understanding of community- or ecosystem-level processes of  
59 below-ground plant–fungus interactions, analyses on community-scale properties of such  
60 host–symbiont associations provide essential insights. For example, if a pathogenic fungal  
61 community consists mainly of species with narrow host ranges, it as a whole is expected to  
62 restrict the emergence of dominant plant species through “negative plant–soil feedback”,  
63 contributing to the maintenance of plant species diversity within an ecosystem [16-18]. In  
64 contrast, with a high proportion of mycorrhizal fungi with narrow host ranges, their specific  
65 host species, such as Pinaceae plants hosting Suillaceae ectomycorrhizal fungi [19], will  
66 dominate the plant community through positive plant–soil feedback [18, 20]. Meanwhile,  
67 endophytic and arbuscular mycorrhizal fungi with broad host ranges [21-23] may diminish  
68 such negative and positive feedback by interlinking otherwise compartmentalized ecological  
69 dynamics (but see [24]). Therefore, concomitant analyses of community-scale properties of  
70 those multiple plant–fungus associations are of particular importance in understanding how  
71 plant–soil feedbacks organize terrestrial ecological processes.

72 Since the application of network science to ecology and mycology, researchers have  
73 evaluated the architecture of networks that represent linkage between plant and fungal

74 communities [25]. Those studies have shown that arbuscular mycorrhizal [26-28],  
75 ectomycorrhizal [29], and ericaceous [30] plant–fungus networks exhibit moderate or low  
76 levels of host–symbiont specificity, while they are structured to avoid overlap of host plant  
77 ranges within fungal communities. In addition, many of those plant–fungus networks [15, 29,  
78 31] are known to lack “nested” architecture (i.e., structure of networks wherein specialist  
79 species interact with subsets of partners of generalist species [32]), which has been commonly  
80 reported in above-ground networks of plant–pollinator and plant–seed-disperser interactions  
81 [32-34] (but see [35]). However, in those previous studies, data of different types of plant–  
82 fungus networks have been collected from different geographic localities with different  
83 sampling strategy, precluding the chance of simultaneously evaluating the effects of  
84 interaction type and geographic factors. Although comparative studies of published data  
85 provide invaluable insights [25], compiled data often vary in the molecular markers used and  
86 they may differ in appropriate null model assumptions in statistically examining network  
87 topological properties.

88 In this study, we compared community-scale properties of arbuscular-mycorrhizal,  
89 ectomycorrhizal, and endophytic associations across eight forest sites spanning from  
90 cool-temperate to subtropical regions in Japan. Based on high-throughput sequencing of  
91 root-associated fungi, we obtained network data depicting how multiple plant species are  
92 associated with respective functional groups of fungi in each of the eight forests. We then  
93 examined how structure varied depending on categories of plant–fungus associations and  
94 geographic locations. Overall, this study provides a first step for integrating insights into  
95 community-scale properties of multiple types of below-ground plant–fungus associations and  
96 their ecosystem-level consequences.

97

## 98 **Methods**

### 99 **Terminology**

100 In analyzing metadata of community-scale properties of plant–fungus associations, we need  
101 to use consistent terminology that can be applied to a wide range of host–symbiont

102 associations. While plant–fungus network properties have been compared within a single  
103 functional group of fungi (e.g., arbuscular mycorrhizal or ectomycorrhizal fungi) in most  
104 studies, we herein target not only arbuscular mycorrhizal and ectomycorrhizal fungi but also  
105 pathogenic and saprotrophic/endophytic fungi. Given that those functional groups of fungi  
106 vary considerably in their microscopic structure within plant tissue [8], developing a general  
107 criterion for mutualistic/antagonistic interactions with host plants is impossible. Thus, we  
108 targeted all the fungi detected by high-throughput sequencing and the data described below  
109 could contain not only mutualistic/antagonistic fungi but also commensalistic fungi merely  
110 adhering to plant roots [36]. In this sense, our data represented symbiotic relationships in the  
111 broad sense, i.e., intimate physical connections between organisms [15, 37].

112

### 113 **Sampling**

114 We collected root samples at eight forest sites (four cool-temperate, one warm-temperate, and  
115 three subtropical forests) across the entire range of the Japanese Archipelago (45.042–24.407  
116 °N; Fig. 1A; Additional file 1: Data S1). In each forest, 2-cm segment of terminal roots were  
117 collected from 3-cm below the soil surface at 1-m horizontal intervals. In each forest, 383  
118 terminal root samples were collected. Those roots were collected indiscriminately regarding  
119 root morphology or apparent mycorrhizal type so that the samples as a whole represented the  
120 relative frequency of plant–fungal associations in the horizon in each forest [38]. Therefore,  
121 while the sample sets consisted mainly of woody plants, they also included herbaceous plants  
122 (Additional file 2: Data S2). Each root sample was preserved in 70% ethanol and stored at -25  
123 °C until DNA extraction.

124

### 125 **Molecular analysis**

126 Each root sample was placed in 70% ethanol with 1-mm zirconium balls and it was then  
127 shaken at 15 Hz for 2 min with a TissueLyser II (Qiagen) [21]. The washed roots were  
128 subsequently pulverized by shaking with 4-mm zirconium balls at 25 Hz for 3 min. DNA

129 extraction was then performed with a cetyltrimethylammonium bromide method [39].

130 The internal transcribed spacer 1 (ITS1) region of root-associated fungi was amplified  
131 with the primers ITS1F\_KYO1 and ITS2\_KYO2, which target not only Ascomycota and  
132 Basidiomycota fungi but also diverse non-Dikarya (e.g., Glomeromycota) taxa [40]. We used  
133 the forward primer ITS1F-KYO1 fused with 3–6-mer Ns for improved Illumina sequencing  
134 quality [41] and the forward Illumina sequencing primer (5'- TCG TCG GCA GCG TCA  
135 GAT GTG TAT AAG AGA CAG- [3–6-mer Ns] – [ITS1-KYO2] -3') and the reverse primer  
136 ITS2-KYO2 fused with 3–6-mer Ns and the reverse sequencing primer (5'- GTC TCG TGG  
137 GCT CGG AGA TGT GTA TAA GAG ACA G [3–6-mer Ns] - [ITS2\_KYO2] -3'). The  
138 DNA polymerase system of KOD FX Neo (Toyobo) was used with a temperature profile of  
139 94 °C for 2 min, followed by 35 cycles at 98 °C for 10 s, 50 °C for 30 s, 68 °C for 50 s, and a  
140 final extension at 68 °C for 5 min. The ramp rate was set to 1 °C/sec to prevent the generation  
141 of chimeric sequences [42]. Illumina sequencing adaptors were then added to each sample in  
142 the subsequent PCR using the forward primers consisting of the P5 Illumina adaptor, 8-mer  
143 tags for sample identification [43], and a partial sequence of the sequencing primer (5'- AAT  
144 GAT ACG GCG ACC ACC GAG ATC TAC AC - [8-mer index] - TCG TCG GCA GCG TC  
145 -3') and the reverse primers consisting of the P7 adaptor, 8-mer tags, and a partial sequence of  
146 the sequencing primer (5'- CAA GCA GAA GAC GGC ATA CGA GAT - [8-mer index] -  
147 GTC TCG TGG GCT CGG -3'). In the reaction, KOD FX Neo was used with a temperature  
148 profile of 94 °C for 2 min, followed by 8 cycles at 98 °C for 10 s, 55 °C for 30 s, 68 °C for 50  
149 s, and a final extension at 68 °C for 5 min. The PCR amplicons of 384 samples in each forest  
150 (including one PCR negative control) were pooled with equal volume after a  
151 purification/equalization process with AMPureXP Kit (Beckman Coulter).

152 For the identification of plants, another set of PCR was performed targeting chloroplast  
153 *rbcL* region with *rbcL\_F3* and *rbcL\_R4* primers [38]. The fusion primer design, DNA  
154 polymerase system, temperature profiles, and purification processes used in the *rbcL* analysis  
155 were the same as those of the fungal ITS analysis. The ITS and *rbcL* libraries were processed  
156 in two Illumina MiSeq runs, in each of which samples of four forest sites were combined (run  
157 center: KYOTO-HE) (2 × 250 cycles; 15% PhiX spike-in).

158

## 159 **Bioinformatics**

160 In total, 17,724,456 and 17,228,848 reads were obtained for the first and second MiSeq runs.  
161 The raw sequencing data were converted into FASTQ files using the program bcl2fastq 1.8.4  
162 provided by Illumina. The FASTQ files were then demultiplexed using the program Claident  
163 v0.2.2016.07.05 [44, 45]. To avoid possible errors resulting from low-quality index sequences,  
164 the sequencing reads whose 8-mer index positions included nucleotides with low (< 30)  
165 quality scores were discarded in this process. As reverse sequences output by Illumina  
166 sequencers have lower quality values than forward sequences, we used only forward  
167 sequences after removing low-quality 3'-ends using Claident (sequencing data deposit: DDBJ  
168 DRA accession: DRA006339). Noisy reads were subsequently discarded and the reads that  
169 passed the filtering process were clustered using VSEARCH [46] as implemented in Claident.  
170 The threshold sequencing similarities in the clustering were set to 97% for fungal ITS and  
171 98% for *rbcL*, respectively. While sequence similarity values have been set to 97% in most  
172 ITS analyses of Ascomycota and Basidiomycota fungi [47] (see also [48]), a recent study  
173 showed that Glomeromycota fungi generally had much higher intraspecific ITS-sequence  
174 variation than Dikarya fungi [49]. Therefore, we performed an additional clustering analysis  
175 with a 94% cutoff similarity for defining Glomeromycota OTUs. Note that changing cut-off  
176 similarities (81–97%) did not qualitatively change statistical properties of plant–fungus  
177 network structure in a previous study [15]. The taxonomic assignment of the OTUs  
178 (Additional files 3-4: Data S3-4) was conducted based on the combination of the  
179 query-centric auto-*k*-nearest neighbor (QCauto) method [44] and the lowest common ancestor  
180 (LCA) algorithm [50] as implemented in Claident. Note that taxonomic identification results  
181 based on the QCauto–LCA approach were comparable to, or sometimes more accurate than,  
182 those with the alternative approach combining the UCLUST algorithm [51] with the UNITE  
183 database [52] [see [30] and [53] for detailed comparison of the QCautoLCA and UCLUST–  
184 UNITE approaches]. The functional group of each fungal OTU was inferred using the  
185 program FUNGuild 1.0 [54]. For 44.1 % (3560/8080) of fungal OTUs, functional group  
186 information was inferred (Additional file 1: Data S1).

187 The obtained information of *rbcL* OTUs was used to identify each root sample, although  
188 species-level taxonomic information was unavailable for some plant taxa in each forest due to  
189 the relatively low variability of the chloroplast region [55]. Thus, we also used the  
190 information of the ITS sequencing libraries, which included not only fungal but also host  
191 plant sequencing reads: there were plant taxa that could not be identified to species even with  
192 ITS information. Based on the *rbcL* and ITS information of plant sequences, possibly  
193 contaminated samples were removed from the dataset.

194 For each of the eight forests, we then obtained a sample (row)  $\times$  fungal OTU (column)  
195 data matrix, in which a cell entry depicted the number of sequencing reads of an OTU in a  
196 sample. The cell entries whose read counts represented less than 0.1% of the total read count  
197 of each sample were subsequently excluded because those rare entries could derive from  
198 contaminations from soil or PCR/sequencing errors [56]. The filtered matrices were then  
199 rarefied to 1,000 reads per sample using the “rarefy” function of the vegan 2.4-3 package  
200 [57] of R 3.4.1 [58]. As the number of samples with 1,000 or more reads varied among the  
201 eight forests examined (240–288 samples), it was equalized by randomly sampling 240  
202 samples without duplication in each forest (“sample-level matrices”; Additional file 2: Data  
203 S2).

204 Based on the sample-level matrices, we obtained another type of matrices, in which a cell  
205 indicated the number of samples representing associations between a plant species/taxa (row)  
206 and a fungal OTU (column) (“species-level matrices”; Additional file 5: Data S5). In addition  
207 to the matrix indicating associations between all fungal OTUs and their host plants (ALL), a  
208 series of partial network matrices representing respective fungal functional groups were  
209 obtained by selecting arbuscular mycorrhizal (AM), ectomycorrhizal (ECM), potentially  
210 pathogenic (PATHO), and saprotrophic/endophytic (SAPENDO) fungal OTUs in each forest  
211 (Additional file 6: Data S6). Due to the limited availability of information of fungal ecology,  
212 functional groups of many fungal OTUs could not be estimated and there were only 9–25  
213 fungal OTUs inferred to be plant pathogens in respective forests (Additional files 1 and 5:  
214 Data S1 and S5).



215

## 216 **Data analysis**

217 Based on the sample-level matrices, relationship between the number of samples and that of  
218 observed fungal OTUs was analyzed for each forest using the “specaccum” function of the  
219 vegan package. The community-scale plant–fungus associations represented by the  
220 species-level matrices (“ALL” network matrices; Additional file 5: Data S5) were visualized  
221 using the program Gephi 0.9.1 [59] with “ForceAtlas2” layout algorithm [60]. We then  
222 analyzed the statistical properties of the ALL networks and partial networks (Additional file  
223 6: Data S6) in terms of the  $H_2'$  metric of network-level interaction specificity [61], which has  
224 been frequently used to measure the degree of interaction specificity in host–symbiont  
225 networks [62, 63]. The plant–fungus associations were evaluated also by the weighted NODF  
226 metric [64] of network nestedness [32], which measures the degree to which specialists  
227 (species with narrow partner ranges) interact with partners of generalists (species with broad  
228 partner ranges) in the same guild or trophic level. We further examined how host plant ranges  
229 were differentiated within the fungal community of each forest based on checkerboard scores  
230 [65]: a high/low score of the checkerboard index indicates host differentiation/overlap within  
231 a guild or trophic level [63]. Although modularity is another important index frequently used  
232 in ecological network studies [33], its computation was too time-consuming to be applied to  
233 randomization analyses (see below) of our present datasets consisting of more than 1,000  
234 fungal OTUs and their host plants. Note that we previously found that below-ground plant–  
235 fungal associations generally showed statistically significant but low network modularity [15,  
236 30, 63].

237 As estimates of network indices could vary depending on species compositions of  
238 examined communities, we standardized the indices as

$$239 \quad \text{relative index value} = [I_{\text{observed}} - \text{mean}(I_{\text{randomized}})] / \text{SD}(I_{\text{randomized}})$$

240 where  $I_{\text{observed}}$  was the index estimate of the observed data matrix, and  $\text{mean}(I_{\text{randomized}})$  and  
241  $\text{SD}(I_{\text{randomized}})$  were the mean and standardized deviation of the index values of randomized  
242 matrices [63]. Randomized matrices were obtained by shuffling host-plant labels in the

243 sample-level matrices and subsequently converting the randomized sample-level matrices into  
244 randomized species-level matrices. Although we used two additional methods [“r2dtable”  
245 [66] and “vaznull” [67] methods] of matrix randomization in our previous studies of plant–  
246 fungus networks [15, 63], they were too time-consuming to be used in the present large  
247 datasets: note that the three randomization methods compared in those previous studies  
248 yielded qualitatively similar results [15, 63]. The number of randomizations was set to 1,000  
249 for  $H_2'$ /nestedness analyses and 100 for checkerboard-score analyses, which required  
250 substantial computing time.

251 Based on the network indices, we examined how the community-scale properties of the  
252 plant–fungus associations varied among local forests and fungal functional groups. For each  
253 of interaction specificity (relative  $H_2'$ ), nestedness (relative weighted NODF nestedness), and  
254 checkerboard index (relative checkerboard values), an ANOVA model was constructed by  
255 incorporating locality (forest sites), fungal functional group, number of plant species/taxa,  
256 number of fungal OTUs, and network connectance (the proportion of non-zero entries in  
257 community matrices) as explanatory variables. The variation in the plant–fungus network  
258 properties was visualized based on a principal component analysis based on a correlation  
259 matrix: the variables included were  $H_2'$  interaction specificity, NODF nestedness,  
260 checkerboard index, number of plant species/taxa, number of fungal OTUs, proportion of  
261 fungal OTUs to plant species/taxa, and connectance.

262

## 263 **Results**

264 Total fungal OTU richness was higher in warm-temperate and subtropical forests than in  
265 cool-temperate forests (Figs. 1b and 2). The OTU richness of AM fungi was higher in the  
266 three subtropical forests, while that of ECM fungi decreased in the southern forests (Fig. 3a).  
267 The ratio of the total number of fungal OTUs to the number of plant species/taxa varied  
268 among forests, although there was no systematic variation between cool-temperate and the  
269 other (warm temperate and subtropical) localities (Fig. 3b). Connectance varied among forests  
270 as well, while it was consistently higher in AM than in ALL, ECM, and SAPENDO

271 networks/partial networks in seven of the eight study forests (Fig. 3c). The connectance of  
272 PATHO partial networks varied considerably among forests presumably due to low OTU  
273 richness and the resultant uncertainty in index estimation.

274 The relative  $H_2'$  metric of interaction specificity significantly varied among forests but  
275 not among fungal functional groups when the effects of plant diversity, fungal OTU richness,  
276 and connectance were controlled in an ANOVA model (Table 1; Fig. 3d). The relative  
277 nestedness of the ALL matrices of plant–fungus associations was lower than zero in most  
278 forests but not in the southern most subtropical forest (Fig. 3e; Additional file 7: Data S7).  
279 Overall, plant–fungus associations in ALL networks were more specialized (Fig. 3d) and less  
280 nested (Fig. 3e) than those of partial networks. In addition, fungal OTUs in ALL networks  
281 displayed stronger differentiation of host ranges than those in partial networks (Fig. 3f).

282 After taking into account plant and fungal diversity in an ANOVA model, neither locality  
283 nor fungal functional group explained the variation in relative nestedness (Table 1). The  
284 relative checkerboard scores varied among localities (Fig. 3f), although the effects of locality  
285 were non-significant in an ANOVA model (Table 1). The ANOVA model showed that the  
286 variation in relative checkerboard scores was explained, to some extent, by fungal functional  
287 groups.

288 In the principal component analysis of network indices, ALL, PATHO and other  
289 networks/partial networks were separated by the first principal component, which represented  
290 high plant diversity, fungal OTU richness, relative  $H_2'$ , and relative checkerboard scores as  
291 well as low relative nestedness (Fig. 4a). By incorporating the third principal component,  
292 which represented high fungal OTU richness and connectance, the cluster of AM partial  
293 networks and that of ECM and SAPENDO partial networks were grouped with some overlap  
294 (Fig. 4b).

295

## 296 **Discussion**

297 Our data, which included 17–55 plant species/taxa and more than 1000 fungal OTUs in each

298 of the eight forests, provided a novel opportunity to evaluate how different types of  
299 below-ground plant–fungus associations varied in their community-scale characteristics along  
300 a latitudinal gradient. We then found that network structural properties differed among  
301 different types of plant–fungus associations (Fig. 3), while geographic factors contributed to  
302 the variation found in network structure (Table 1). Specifically, arbuscular mycorrhizal  
303 networks differed in their architecture from ectomycorrhizal and saprotrophic/endophytic  
304 networks, characterized by high connectance (Fig. 4). We also found that networks consisting  
305 of all functional groups of fungi and their host plants had higher network-level interaction  
306 specificity, more differentiated host ranges between fungi, and lower network nestedness than  
307 the partial networks of arbuscular mycorrhizal, ectomycorrhizal, and saprotrophic/endophytic  
308 associations (Figs. 3 and 4). As in previous studies, our data included many fungal OTUs  
309 unassigned to functional groups due to the paucity of the information of fungal functions and  
310 guilds in databases [54]. However, by extending findings in previous plant–fungus network  
311 studies [28, 29, 63], in which sampling strategies, interaction type, or geographic factors were  
312 not controlled systematically, this study offers a basis for discussing how different types of  
313 below-ground plant–fungus associations collectively build plant–soil feedback in terrestrial  
314 ecosystems.

315 Among the network indices examined in this study, nestedness showed an idiosyncratic  
316 tendency in light of other types of interaction networks examined in community ecology  
317 [32–34]. We found that below-ground plant–fungus networks often displayed “anti-nested”  
318 architecture, in which scores representing nested network structure were lower than those  
319 expected by chance (i.e., negative values of relative nestedness; Fig. 3e), as suggested also in  
320 previous studies [15, 29, 63]. Although factors organizing anti-nested network architecture  
321 remain to be investigated, competition for host plants among fungal species has been inferred  
322 to decrease nestedness of plant–fungus associations [63]. In addition, a previous comparative  
323 study suggested that plant–fungus network nestedness decreased with increasing annual mean  
324 temperature on a global scale [25].

325 The prevalence of anti-nested or non-nested network structures is in sharp contrast to  
326 observations on other types of plant–partner networks, which commonly show statistically

327 significant nested architecture [32]. Specifically, plant–pollinator and plant–seed disperser  
328 interactions are generally characterized by nested network architecture in which overlap of  
329 partner ranges within the same guild are expected to mitigate competition between plant  
330 species [32-34]. Therefore, anti-nested structure of plant–fungus networks provides important  
331 insights in terms of community ecological theory linking network structure and species  
332 coexistence [34, 35, 68]. Given that below-ground fungi constitute one of the most  
333 species-rich components of the terrestrial biosphere [3], understanding community-scale  
334 properties of below-ground plant–fungus associations is a major step for disentangling  
335 relationship among network structure, species coexistence, and community stability.

336 To overcome the inconsistency between theory and observations, we may need to take  
337 into account basic biology of below-ground plant–fungus associations. We here highlight two  
338 backgrounds that need more attention for deepening discussion on ecological networks and  
339 species coexistence. First, in contrast to plant–pollinator or plant–seed disperser networks,  
340 which are often assumed to consist only of mutualistic interactions, below-ground plant–  
341 fungus networks can involve not only mutualistic but also antagonistic and commensalistic  
342 interactions. This diversity of interaction type can lead to high stability of below-ground  
343 fungal and their host plant communities. Specifically, while communities consisting  
344 exclusively of mutualistic interactions are inherently unstable [69], involvement of a small  
345 fraction of antagonistic interactions in those communities can dramatically enhance species  
346 coexistence [70]. Second, because fungi can disperse long distances as spores [71, 72] (but  
347 see [73]), their local species richness (alpha diversity) may be greatly impacted by  
348 metacommunity processes [74]. Interestingly, a recent theoretical study on food webs  
349 predicted that strong coupling of local communities within a metacommunity could result in  
350 positive relationship between species richness and community stability [75]. Such theoretical  
351 evaluation of metacommunity dynamics has been extended to systems involving mutualistic  
352 interactions [76], providing platforms for considering how dispersal abilities of constituent  
353 species determine local species richness/coexistence of different types of plant–partner  
354 networks.

355 To apply a standardized criterion for plant–fungus associations, we did not perform any

356 data screening based on the “mycorrhizal types” of plant species. As a result, our data  
357 included plant–fungus combinations that could not be classified into well-recognized  
358 categories of mycorrhizal symbioses [8]. For example, ectomycorrhizal fungi were detected  
359 not only from plant species in “ectomycorrhizal” families (e.g., Fagaceae, Pinaceae, and  
360 Betulaceae) but also from other plant species (Fig. 2; Additional file 6: Data S6). In addition,  
361 the data included network links between arbuscular mycorrhizal fungi and ectomycorrhizal  
362 plant species (Additional file 6: Data S6) as reported previously [77]. Although such plant–  
363 fungus associations that do not fall into classic categories of mycorrhizal symbioses seldom  
364 attract attention and they are often removed from high-throughput sequencing datasets, some  
365 of them may represent important ecological interactions. An ectomycorrhizal fungus in the  
366 truffle genus (*Tuber melanosporum*), for instance, is known to cause severe necrosis in root  
367 cortices of non-ectomycorrhizal herbaceous plants [78]. Thus, for the standardization of  
368 plant–fungus network analyses inferred with high-throughput sequencing, we need to take  
369 into account the possibility that network links can represent not only mutualistic but also  
370 neutral and antagonistic interactions [15]. Given also that even well-known combinations of  
371 plant–fungus mycorrhizal interactions can result in antagonistic interaction depending on soil  
372 environmental conditions and host plant nutrition [79, 80], potential diversity of ecological  
373 interactions within a network and its community-scale consequences [70] deserve intensive  
374 research.

375 Our community-scale comparative analysis targeting a broad latitudinal range from  
376 cool-temperate to subtropical regions has some implications for geographic diversity patterns  
377 of plant-associated fungi, although careful interpretation is required given the small number  
378 of study sites. The number of detected ectomycorrhizal fungal OTUs was lower in subtropical  
379 than in temperate forests (Fig. 3a), presumably reflecting geographic variation in the relative  
380 abundance of Fagaceae, Pinaceae, and Betulaceae plants in plant communities as discussed in  
381 previous studies [81-84] (see also [85]). In contrast, the number of arbuscular mycorrhizal  
382 fungal OTUs increased towards south in our data, while a previous meta-analysis detected no  
383 latitudinal diversity gradient regarding the fungal functional group [86] (see also [87]). The  
384 total number of fungal OTUs was also higher in subtropical forests, peaked in the

385 southernmost site. Interestingly, unlike other study sites, the southernmost sampling site was  
386 characterized by low levels of network-scale interaction specificity and host plant  
387 differentiation as well as by the absence of anti-nested network architecture. Although some  
388 pioneering studies have investigated host preferences of tropical fungi [88-90], it remains a  
389 major challenge to examine whether the observed latitudinal gradient in plant–fungus network  
390 structure is extended to tropical regions.

391

## 392 **Conclusions**

393 Based on the large datasets of root-associated fungi, we herein showed how plant–fungus  
394 network architecture vary across a latitudinal gradient across the Japanese Archipelago. For  
395 further understanding the diversity of below-ground plant–fungus associations, more  
396 comparative studies of community-scale characteristics are required especially in the tropics.  
397 Moreover, further data of networks consisting of pathogenic fungi and their host plants are  
398 awaited to discuss community-scale properties of negative plant–soil feedbacks [91]. Given  
399 that the number of pathogenic fungi included in our present analysis was too few to evaluate  
400 statistical features of their networks, selective sampling of pathogen infected plant individuals  
401 may be necessary. Improving reference databases of fungal functions is also an important  
402 challenge towards better understanding of the roles of fungal communities. More  
403 macroecological studies of plant–fungus interactions [73, 92, 93], along with experimental  
404 studies testing functions of poorly characterized fungi [11, 13, 14], will reorganize our  
405 knowledge of terrestrial ecosystem processes.

406

## 407 **Abbreviations**

408 ANOVA: analysis of variance; DDBJ: DNA Data Bank of Japan; ITS: internal transcribed  
409 spacer; LCA: lowest common ancestor; OTU: Operational taxonomic unit; QCauto method:  
410 query-centric auto-*k*-nearest neighbor method.

411

## 412 **Acknowledgements**

413 We thank Teshio Experimental Forest (Hokkaido University), Tomakomai Experimental  
414 Forest (Hokkaido University), Sugadaira Research Station (Tsukuba University), Yona Field  
415 (Ryukyu University), Tropical Biosphere Research Center (Ryukyu University), and Forestry  
416 Agency of Japan for the permission of fieldwork and Takayuki Ohgue, Takahiko Koizumi,  
417 Miyako Natsume, Ayu Narita, Yoriko Sugiyama, and Yamato Unnno, Yuko Sawanobori, and  
418 Minato Kodama for their support in molecular experiments.

419

#### 420 **Funding**

421 This work was financially supported by JSPS KAKENHI Grant (26711026), JST PRESTO  
422 (JPMJPR16Q6), and the Funding Program for Next Generation World-Leading Researchers  
423 of Cabinet Office, the Government of Japan (GS014) to HT.

424

#### 425 **Availability of data and materials**

426 The Illumina sequencing data were deposited to DNA Data Bank of Japan (DDBJ Sequence  
427 Read Archive: DRA006339). The raw data of fungal community structure and the fungal  
428 community matrices analyzed are available as Additional files 1-6.

429

#### 430 **Authors' contributions**

431 HT designed the work. HT, HS, SY, and AST conducted fieldwork. HT, HS, and SY  
432 performed the molecular experiments. HT wrote the manuscript with HS, SY, and AST.

433

#### 434 **Competing interests**

435 The authors declare that they have no competing interests.

436

#### 437 **Consent for publication**

438 Not applicable



439

440 **Ethics approval and consent to participate**

441 Not applicable

442

443 **Additional files**

444 **Additional file 1: Data S1.** Information of study sites, taxonomic and functional-group  
445 information of the fungal OTUs detected.

446 **Additional file 2: Data S2.** Sample-level matrices of plant–fungus associations.

447 **Additional file 3: Data S3.** Sequences of the non-glomeromycete fungal OTUs detected.

448 **Additional file 4: Data S4.** Sequences of the glomeromycete fungal OTUs detected.

449 **Additional file 5: Data S5.** Species-level matrices of plant–fungus associations.

450 **Additional file 6: Data S6.** Network data matrices.

451 **Additional file 7: Data S7.** Results of the randomization analysis.

452

453 **References**

454 1. van der Heijden MG, Bardgett RD, van Straalen NM: The unseen majority: soil  
455 microbes as drivers of plant diversity and productivity in terrestrial ecosystems. *Ecol*  
456 *Lett* 2008;11:296-310.

457 2. Wardle DA, Bardgett RD, Klironomos JN, Setälä H, van der Putten WH, Wall DH:  
458 Ecological linkages between aboveground and belowground biota. *Science*  
459 2004;304:1629-1633.

460 3. Peay KG, Kennedy PG, Talbot JM: Dimensions of biodiversity in the Earth  
461 mycobiome. *Nature Rev Microbiol* 2016;14:434-447.

462 4. Blackwell M: The Fungi: 1, 2, 3... 5.1 million species? *Am J Bot* 2011;98:426-438.

- 463 5. Finlay R, Read D: The structure and function of the vegetative mycelium of  
464 ectomycorrhizal plants. II. The uptake and distribution of phosphorus by mycelial  
465 strands interconnecting host plants. *New Phytol* 1986;103:157-165.
- 466 6. Nara K: Ectomycorrhizal networks and seedling establishment during early primary  
467 succession. *New Phytol* 2006;169:169-178.
- 468 7. Azcón-Aguilar C, Barea J: Arbuscular mycorrhizas and biological control of  
469 soil-borne plant pathogens—an overview of the mechanisms involved. *Mycorrhiza*  
470 1997;6:457-464.
- 471 8. Smith SE, Read DJ: *Mycorrhizal symbiosis*. New York: Academic press; 2008.
- 472 9. Augspurger CK: Seed dispersal of the tropical tree, *Platypodium elegans*, and the  
473 escape of its seedlings from fungal pathogens. *J Ecol* 1983;71:759-771.
- 474 10. Mangan SA, Schnitzer SA, Herre EA, Mack KM, Valencia MC, Sanchez EI et al:  
475 Negative plant-soil feedback predicts tree-species relative abundance in a tropical  
476 forest. *Nature* 2010;466:752-755.
- 477 11. Narisawa K, Kawamata H, Currah RS, Hashiba T: Suppression of *Verticillium wilt* in  
478 eggplant by some fungal root endophytes. *Eur J Plant Pathol* 2002;108:103-109.
- 479 12. Almario J, Jeena G, Wunder J, Langen G, Zuccaro A, Coupland G et al:  
480 Root-associated fungal microbiota of nonmycorrhizal *Arabidopsis thaliana* and its  
481 contribution to plant phosphorus nutrition. *Proc Natl Acad Sci USA* 2017;114:E9403–  
482 E9412.
- 483 13. Hiruma K, Gerlach N, Sacristán S, Nakano RT, Hacquard S, Kracher B et al: Root  
484 endophyte *Colletotrichum tofieldiae* confers plant fitness benefits that are phosphate  
485 status dependent. *Cell* 2016;165:464-474.
- 486 14. Newsham KK: A meta-analysis of plant responses to dark septate root endophytes.  
487 *New Phytol* 2011;190:783-793.
- 488 15. Toju H, Guimarães PR, Jr, Olesen JM, Thompson JN: Assembly of complex plant–  
489 fungus networks. *Nature Commun* 2014;5:5273.
- 490 16. Mills KE, Bever JD: Maintenance of diversity within plant communities: soil  
491 pathogens as agents of negative feedback. *Ecology* 1998;79:1595-1601.

- 492 17. Packer A, Clay K: Soil pathogens and spatial patterns of seedling mortality in a  
493 temperate tree. *Nature* 2000;404:278-281.
- 494 18. Bever JD, Dickie IA, Facelli E, Facelli JM, Klironomos J, Moora M et al: Rooting  
495 theories of plant community ecology in microbial interactions. *Trends Ecol Evol*  
496 2010;25:468-478.
- 497 19. Bruns TD, Bidartondo MI, Taylor DL: Host specificity in ectomycorrhizal  
498 communities: what do the exceptions tell us? *Integr Comp Biol* 2002;42:352-359.
- 499 20. McGuire KL: Common ectomycorrhizal networks may maintain monodominance in a  
500 tropical rain forest. *Ecology* 2007;88:567-574.
- 501 21. Toju H, Yamamoto S, Sato H, Tanabe AS, Gilbert GS, Kadowaki K: Community  
502 composition of root-associated fungi in a *Quercus*-dominated temperate forest:  
503 “codominance” of mycorrhizal and root-endophytic fungi. *Ecol Evol*  
504 2013;3:1281-1293.
- 505 22. Öpik M, Metsis M, Daniell T, Zobel M, Moora M: Large - scale parallel 454  
506 sequencing reveals host ecological group specificity of arbuscular mycorrhizal fungi  
507 in a boreonemoral forest. *New Phytol* 2009;184:424-437.
- 508 23. Allen EB, Allen MF, Helm DJ, Trappe JM, Molina R, Rincon E: Patterns and  
509 regulation of mycorrhizal plant and fungal diversity. *Plant Soil* 1995;170:47-62.
- 510 24. Bever JD: Negative feedback within a mutualism: host-specific growth of  
511 mycorrhizal fungi reduces plant benefit. *Proc R Soc Lond Ser B* 2002;269:2595-2601.
- 512 25. Pölme S, Bahram M, Jacquemyn H, Kennedy P, Kohout P, Moora M et al: Host  
513 preference and network properties in biotrophic plant-fungal associations. *New Phytol*  
514 2018;217:1230-1239.
- 515 26. Bennett AE, Daniell TJ, Öpik M, Davison J, Moora M, Zobel M et al: Arbuscular  
516 mycorrhizal fungal networks vary throughout the growing season and between  
517 successional stages. *PLOS ONE* 2013;8:e83241.
- 518 27. Chagnon PL, Bradley RL, Klironomos JN: Using ecological network theory to  
519 evaluate the causes and consequences of arbuscular mycorrhizal community structure.  
520 *New Phytol* 2012;194:307-312.

- 521 28. Montesinos-Navarro A, Segarra-Moragues JG, Valiente-Banuet A, Verdú M: The  
522 network structure of plant–arbuscular mycorrhizal fungi. *New Phytol*  
523 2012;194:536-547.
- 524 29. Bahram M, Harend H, Tedersoo L: Network perspectives of ectomycorrhizal  
525 associations. *Fungal Ecol* 2014;7:70-77.
- 526 30. Toju H, Tanabe A, Ishii H: Ericaceous plant–fungus network in a harsh alpine–  
527 subalpine environment. *Mol Ecol* 2016;25:3242-3257.
- 528 31. Jacquemyn H, Brys R, Merckx VS, Waud M, Lievens B, Wiegand T: Coexisting  
529 orchid species have distinct mycorrhizal communities and display strong spatial  
530 segregation. *New Phytol* 2014;202:616-627.
- 531 32. Bascompte J, Jordano P, Melián CJ, Olesen JM: The nested assembly of plant-animal  
532 mutualistic networks. *Proc Natl Acad Sci USA* 2003;100:9383-9387.
- 533 33. Olesen JM, Bascompte J, Dupont YL, Jordano P: The modularity of pollination  
534 networks. *Proc Natl Acad Sci USA* 2007;104:19891-19896.
- 535 34. Bastolla U, Fortuna MA, Pascual-García A, Ferrera A, Luque B, Bascompte J: The  
536 architecture of mutualistic networks minimizes competition and increases biodiversity.  
537 *Nature* 2009;458:1018-1020.
- 538 35. Staniczenko PP, Kopp JC, Allesina S: The ghost of nestedness in ecological networks.  
539 *Nature Commun* 2013;4:1391.
- 540 36. Caruso T, Rillig MC, Garlaschelli D: On the application of network theory to  
541 arbuscular mycorrhizal fungi–plant interactions: the importance of basic assumptions.  
542 *New Phytol* 2012;194:891-894.
- 543 37. Thompson JN: *The geographic mosaic of coevolution*. Chicago: University of  
544 Chicago Press; 2005.
- 545 38. Toju H, Yamamoto S, Sato H, Tanabe AS: Sharing of diverse mycorrhizal and  
546 root-endophytic fungi among plant species in an oak-dominated cool-temperate forest.  
547 *PLOS ONE* 2013;8:e78248.
- 548 39. Sato H, Murakami N: Reproductive isolation among cryptic species in the  
549 ectomycorrhizal genus *Strobilomyces*: population-level CAPS marker-based genetic

- 550 analysis. Mol Phyl Evol 2008;48:326-334.
- 551 40. Toju H, Tanabe AS, Yamamoto S, Sato H: High-coverage ITS primers for the  
552 DNA-based identification of ascomycetes and basidiomycetes in environmental  
553 samples. PLOS ONE 2012;7:e40863.
- 554 41. Lundberg DS, Yourstone S, Mieczkowski P, Jones CD, Dangl JL: Practical  
555 innovations for high-throughput amplicon sequencing. Nature Methods  
556 2013;10:999-1002.
- 557 42. Stevens JL, Jackson RL, Olson JB: Slowing PCR ramp speed reduces chimera  
558 formation from environmental samples. J Microbiol Method 2013;93:203-205.
- 559 43. Hamady M, Walker JJ, Harris JK, Gold NJ, Knight R: Error-correcting barcoded  
560 primers for pyrosequencing hundreds of samples in multiplex. Nature Methods  
561 2008;5:235-237.
- 562 44. Tanabe AS, Toju H: Two new computational methods for universal DNA barcoding: a  
563 benchmark using barcode sequences of bacteria, archaea, animals, fungi, and land  
564 plants. PLOS ONE 2013;8:e76910.
- 565 45. Tanabe AS: Claident v0.2.2016.07.05, a software distributed by author at  
566 <http://www.fifthdimension.jp/>. 2016.
- 567 46. Rognes T, Mahé F, Flouri T, Quince C, Nichols B: Vsearch: program available at  
568 <https://github.com/torognes/vsearch>. In.; 2014.
- 569 47. Smith DP, Peay KG: Sequence depth, not PCR replication, improves ecological  
570 inference from next generation DNA sequencing. PLOS ONE 2014;9:e90234.
- 571 48. Kõljalg U, Nilsson RH, Abarenkov K, Tedersoo L, Taylor AF, Bahram M et al:  
572 Towards a unified paradigm for sequence-based identification of fungi. Mol Ecol  
573 2013;22:5271-5277.
- 574 49. Thiéry O, Vasar M, Jairus T, Davison J, Roux C, Kivistik PA et al: Sequence variation  
575 in nuclear ribosomal small subunit, internal transcribed spacer and large subunit  
576 regions of *Rhizophagus irregularis* and *Gigaspora margarita* is high and isolate -  
577 dependent. Mol Ecol 2016;25:2816-2832.
- 578 50. Huson DH, Auch AF, Qi J, Schuster SC: MEGAN analysis of metagenomic data.

- 579 Genome Res 2007;17:377-386.
- 580 51. Edgar RC: Search and clustering orders of magnitude faster than BLAST.  
581 Bioinformatics 2010;26:2460-2461.
- 582 52. Abarenkov K, Henrik Nilsson R, Larsson KH, Alexander IJ, Eberhardt U, Erland S et  
583 al: The UNITE database for molecular identification of fungi—recent updates and  
584 future perspectives. New Phytol 2010;186:281-285.
- 585 53. Toju H, Yamamoto S, Tanabe AS, Hayakawa T, Ishii HS: Network modules and hubs  
586 in plant-root fungal biome. J R Soc Int 2016;13:20151097.
- 587 54. Nguyen NH, Song Z, Bates ST, Branco S, Tedersoo L, Menke J et al: FUNGuild: an  
588 open annotation tool for parsing fungal community datasets by ecological guild.  
589 Fungal Ecol 2016;20:241-248.
- 590 55. CBOL-Plant-Working-Group, Hollingsworth PM, Forrest LL, Spouge JL, Hajibabaei  
591 M, Ratnasingham S et al: A DNA barcode for land plants. Proc Natl Acad Sci USA  
592 2009;106:12794-12797.
- 593 56. Peay KG, Russo SE, McGuire KL, Lim Z, Chan JP, Tan S et al: Lack of host  
594 specificity leads to independent assortment of dipterocarps and ectomycorrhizal fungi  
595 across a soil fertility gradient. Ecol Lett 2015;18:807-816.
- 596 57. Oksanen J, Blanchet FG, Kindt R, Legendre P, Minchin PR, O'Hara RB et al: Vegan:  
597 community ecology package. R package version 2.0-3 available at  
598 <http://CRAN.R-project.org/package=vegan>. 2012;10:2008.
- 599 58. R-Core-Team: R 3.4.1: A language and environment for statistical computing  
600 available at <http://www.R-project.org/>. In. Vienna, Austri: R Foundation for  
601 Statistical Computing; 2015.
- 602 59. Bastian M, Heymann S, Jacomy M: Gephi: an open source software for exploring and  
603 manipulating networks. Proc 3rd Int AAAI Conf Weblogs Soc Media 2009;8:361-362.
- 604 60. Jacomy M, Heymann S, Venturini T, Bastian M: ForceAtlas2, a continuous graph  
605 layout algorithm for handy network visualization designed for the Gephi Software.  
606 PLOS ONE 2011;96:e98679.
- 607 61. Blüthgen N, Menzel F, Blüthgen N: Measuring specialization in species interaction

- 608 networks. *BMC Ecol* 2006;6:9.
- 609 62. Blüthgen N, Menzel F, Hovestadt T, Fiala B: Specialization, constraints, and  
610 conflicting interests in mutualistic networks. *Curr Biol* 2007;17:341-346.
- 611 63. Toju H, Guimarães PR, Jr, Olesen JM, Thompson JN: Below-ground plant–fungus  
612 network topology is not congruent with above-ground plant–animal network topology.  
613 *Sci Adv* 2015;1:e1500291.
- 614 64. Almeida-Neto M, Ulrich W: A straightforward computational approach for measuring  
615 nestedness using quantitative matrices. *Env Model Software* 2011;26:173-178.
- 616 65. Stone L, Roberts A: The checkerboard score and species distributions. *Oecologia*  
617 1990;85:74-79.
- 618 66. Dormann CF, Fründ J, Blüthgen N, Gruber B: Indices, graphs and null models:  
619 analyzing bipartite ecological networks. *Open Ecol J* 2009;2:7-24.
- 620 67. Vázquez DP, Melián CJ, Williams NM, Blüthgen N, Krasnov BR, Poulin R: Species  
621 abundance and asymmetric interaction strength in ecological networks. *Oikos*  
622 2007;116:1120-1127.
- 623 68. Rohr RP, Saavedra S, Bascompte J: On the structural stability of mutualistic systems.  
624 *Science* 2014;345:1253497.
- 625 69. Allesina S, Tang S: Stability criteria for complex ecosystems. *Nature*  
626 2012;483:205-208.
- 627 70. Mougi A, Kondoh M: Diversity of interaction types and ecological community  
628 stability. *Science* 2012;337:349-351.
- 629 71. Sato H, Tsujino R, Kurita K, Yokoyama K, Agata K: Modelling the global distribution  
630 of fungal species: new insights into microbial cosmopolitanism. *Mol Ecol*  
631 2012;21:5599-5612.
- 632 72. Nagarajan S, Singh D: Long-distance dispersion of rust pathogens. *Ann Rev*  
633 *Phytopathol* 1990;28:139-153.
- 634 73. Talbot JM, Bruns TD, Taylor JW, Smith DP, Branco S, Glassman SI et al: Endemism  
635 and functional convergence across the North American soil mycobiome. *Proc Natl*

- 636 Acad Sci USA 2014;111:6341-6346.
- 637 74. Hubbell SP: The unified neutral theory of biodiversity and biogeography, vol. 32.  
638 Princeton: Princeton University Press; 2001.
- 639 75. Mougi A, Kondoh M: Food-web complexity, meta-community complexity and  
640 community stability. Sci Rep 2016;6:srep24478.
- 641 76. Gravel D, Massol F, Leibold MA: Stability and complexity in model meta-ecosystems.  
642 Nature Commun 2016;7:12457.
- 643 77. Dickie IA, Koide RT, Fayish AC: Vesicular-arbuscular mycorrhizal infection of  
644 *Quercus rubra* seedlings. New Phytol 2001;151:257-264.
- 645 78. Plattner I, Hall I: Parasitism of non-host plants by the mycorrhizal fungus *Tuber*  
646 *melanosporum*. Mycol Res 1995;99:1367-1370.
- 647 79. Hoeksema JD, Chaudhary VB, Gehring CA, Johnson NC, Karst J, Koide RT et al: A  
648 meta - analysis of context-dependency in plant response to inoculation with  
649 mycorrhizal fungi. Ecol Lett 2010;13:394-407.
- 650 80. Johnson NC, Graham JH: The continuum concept remains a useful framework for  
651 studying mycorrhizal functioning. Plant Soil 2013;363:411-419.
- 652 81. Tedersoo L, Bahram M, Põlme S, Kõljalg U, Yorou NS, Wijesundera R et al: Global  
653 diversity and geography of soil fungi. Science 2014;346:1256688.
- 654 82. Tedersoo L, Bahram M, Toots M, Diedhiou AG, Henkel TW, Kjøller R et al: Towards  
655 global patterns in the diversity and community structure of ectomycorrhizal fungi.  
656 Mol Ecol 2012;21:4160-4170.
- 657 83. Tedersoo L, Nara K: General latitudinal gradient of biodiversity is reversed in  
658 ectomycorrhizal fungi. New Phytol 2010;185:351-354.
- 659 84. Põlme S, Bahram M, Yamanaka T, Nara K, Dai YC, Grebenc T et al: Biogeography  
660 of ectomycorrhizal fungi associated with alders (*Alnus* spp.) in relation to biotic and  
661 abiotic variables at the global scale. New Phytol 2013;198:1239-1249.
- 662 85. Gao C, Zhang Y, Shi NN, Zheng Y, Chen L, Wubet T et al: Community assembly of  
663 ectomycorrhizal fungi along a subtropical secondary forest succession. New Phytol



- 664 2015;205:771-785.
- 665 86. Öpik M, Vanatoa A, Vanatoa E, Moora M, Davison J, Kalwij J et al: The online  
666 database MaarjAM reveals global and ecosystemic distribution patterns in arbuscular  
667 mycorrhizal fungi (Glomeromycota). *New Phytol* 2010;188:223-241.
- 668 87. Pärtel M, Öpik M, Moora M, Tedersoo L, Szava - Kovats R, Rosendahl S et al:  
669 Historical biome distribution and recent human disturbance shape the diversity of  
670 arbuscular mycorrhizal fungi. *New Phytol* 2017;216:227-238.
- 671 88. Tedersoo L, Sadam A, Zambrano M, Valencia R, Bahram M: Low diversity and high  
672 host preference of ectomycorrhizal fungi in Western Amazonia, a neotropical  
673 biodiversity hotspot. *ISME J* 2010;4:465-471.
- 674 89. Sato H, Tanabe AS, Toju H: Contrasting diversity and host association of  
675 ectomycorrhizal basidiomycetes versus root-associated ascomycetes in a dipterocarp  
676 rainforest. *PLOS ONE* 2015;10:e0125550.
- 677 90. Husband R, Herre E, Turner S, Gallery R, Young J: Molecular diversity of arbuscular  
678 mycorrhizal fungi and patterns of host association over time and space in a tropical  
679 forest. *Mol Ecol* 2002;11:2669-2678.
- 680 91. LaManna JA, Mangan SA, Alonso A, Bourg NA, Brockelman WY, Bunyavejchewin  
681 S et al: Plant diversity increases with the strength of negative density dependence at  
682 the global scale. *Science* 2017;356:1389-1392.
- 683 92. Arnold AE, Lutzoni F: Diversity and host range of foliar fungal endophytes: are  
684 tropical leaves biodiversity hotspots? *Ecology* 2007;88:541-549.
- 685 93. Schemske DW, Mittelbach GG, Cornell HV, Sobel JM, Roy K: Is there a latitudinal  
686 gradient in the importance of biotic interactions? *Ann Rev Ecol Evol Syst*  
687 2009;40:245-269.
- 688
- 689

690 **Table 1** Potential factors contributing to variation in plant–fungus network structure. For each  
 691 response variable representing network structure, an ANOVA model including the number of  
 692 plant species/taxa, that of fungal OTUs, network connectance, sampling locality, and fungal  
 693 functional groups (i.e., categories of plant–fungus networks) was constructed. *P* values  
 694 significant after a Bonferroni correction are shown in bold for ANOVA model.

695

| Response variable                | Explanatory variable   | df | <i>F</i> | <i>P</i>        |
|----------------------------------|------------------------|----|----------|-----------------|
| Relative interaction specificity | No. plant species/taxa | 1  | 4.6      | 0.0426          |
|                                  | No. fungal OTUs        | 1  | 96.9     | < <b>0.0001</b> |
|                                  | Connectance            | 1  | 10.1     | <b>0.0040</b>   |
|                                  | Locality               | 7  | 4.0      | <b>0.0048</b>   |
|                                  | Functional group       | 4  | 2.6      | 0.0572          |
| Relative nestedness              | No. plant species/taxa | 1  | 5.1      | 0.0322          |
|                                  | No. fungal OTUs        | 1  | 39.3     | < <b>0.0001</b> |
|                                  | Connectance            | 1  | 2.4      | 0.1308          |
|                                  | Locality               | 7  | 1.5      | 0.2216          |
|                                  | Functional group       | 4  | 2.1      | 0.1179          |
| Relative checkerboard score      | No. plant species/taxa | 1  | 1.0      | 0.3182          |
|                                  | No. fungal OTUs        | 1  | 62.9     | < <b>0.0001</b> |
|                                  | Connectance            | 1  | 5.6      | 0.0262          |
|                                  | Locality               | 7  | 1.3      | 0.2772          |
|                                  | Functional group       | 4  | 4.0      | <b>0.0121</b>   |

696

697

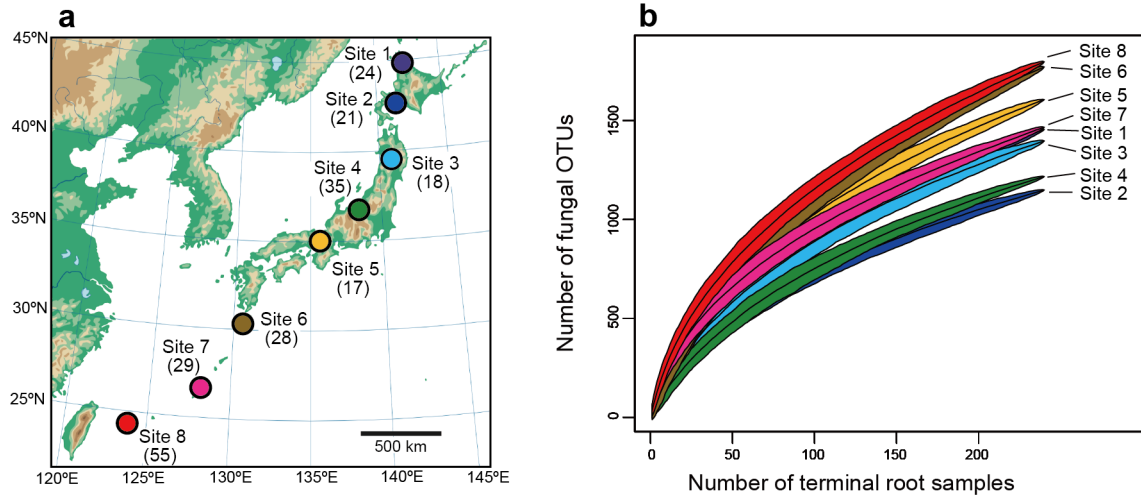

698

699

700 **Fig. 1** Study sites. **a** Map of study sites. In each forest site, a number in a parenthesis indicates  
701 the number of plant species/taxa observed in the 240 terminal root samples from which  
702 sequencing data were successfully obtained. **b** Relationship between the number of samples  
703 and that of plant species/taxa observed. A rarefaction curve obtained from 240 terminal-root  
704 samples is shown for each study site.

705

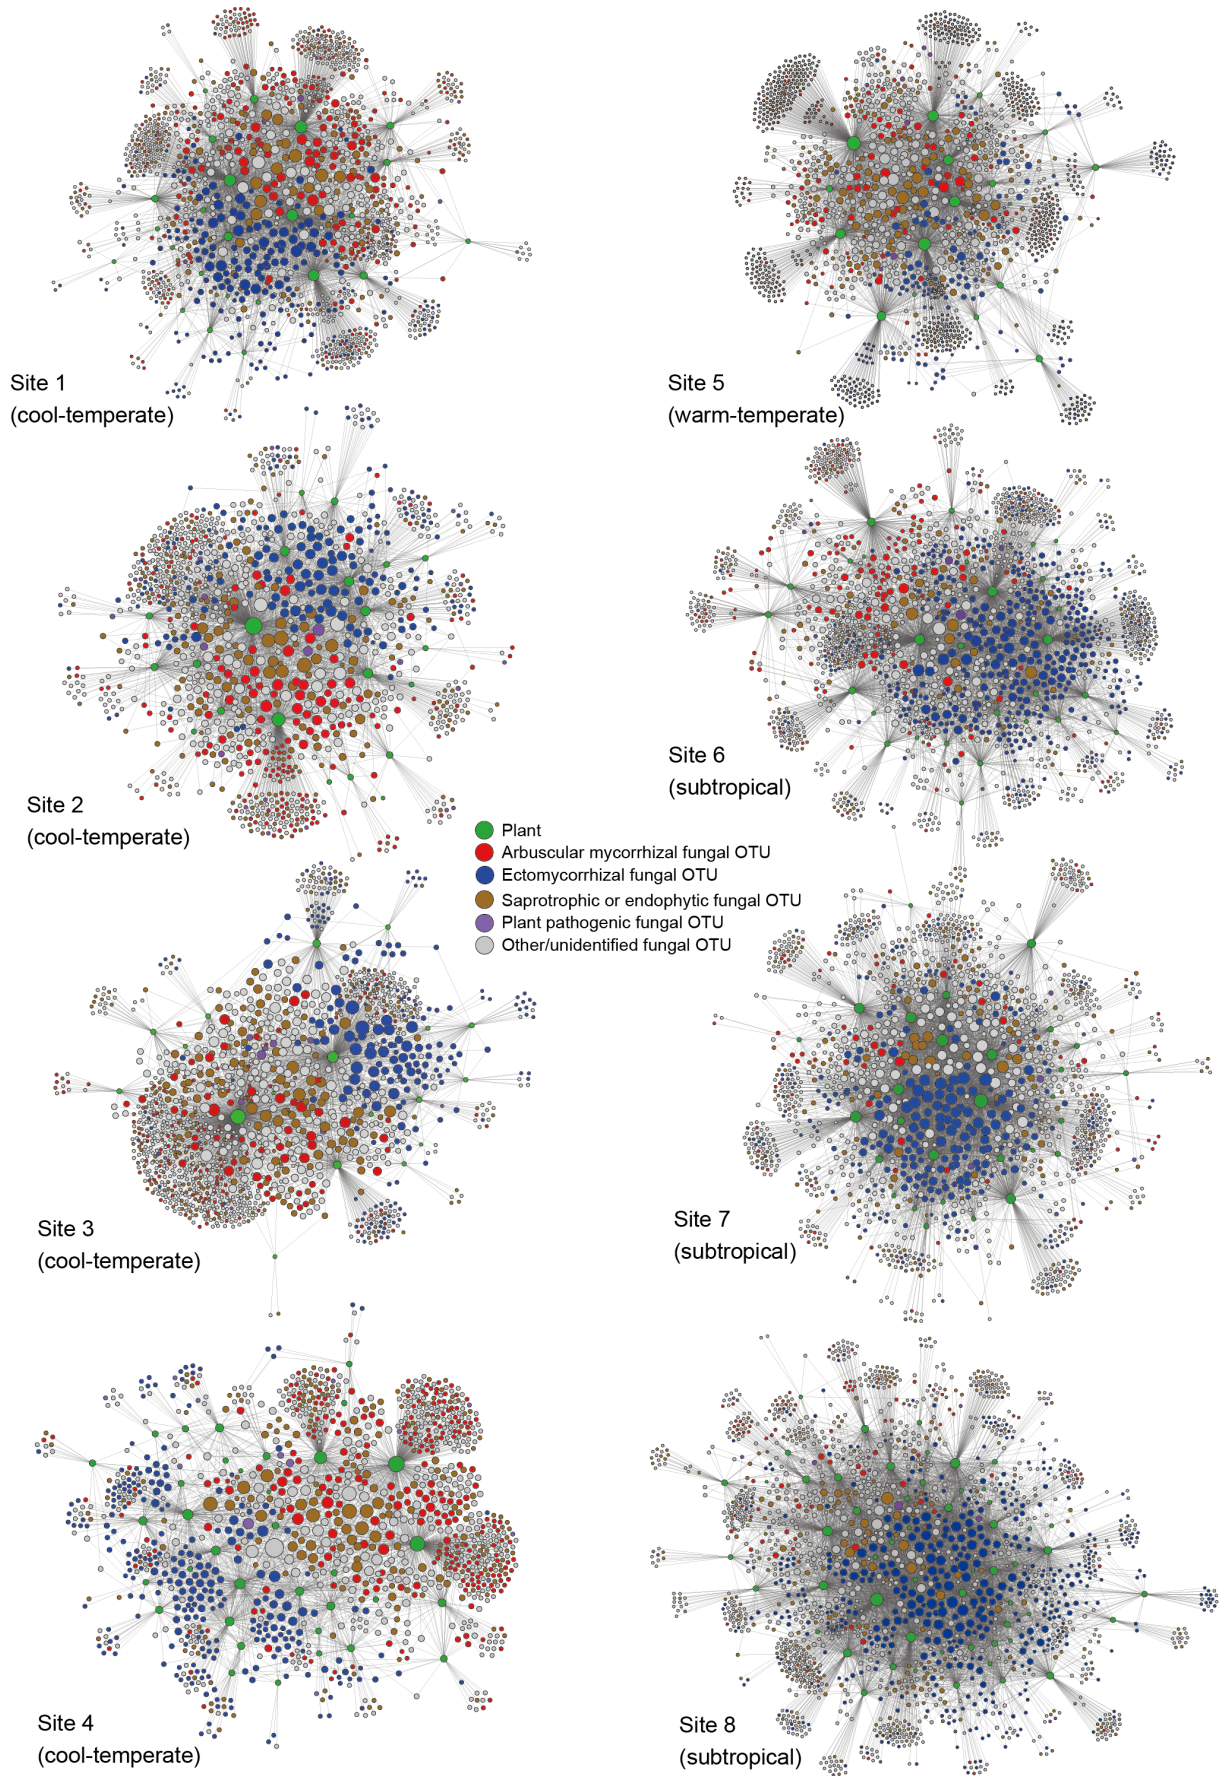

706

707

708 **Fig. 2** Below-ground plant–fungus networks. The “ALL” network involving all the  
709 root-associated fungal OTUs detected and their host plant species/taxa is shown for each  
710 forest. The OTUs/species in the networks are arranged with the “ForceAtlas2” layout  
711 algorithm [60]. Size of circles represents betweenness centrality scores compared within  
712 plant/fungal community.  
713

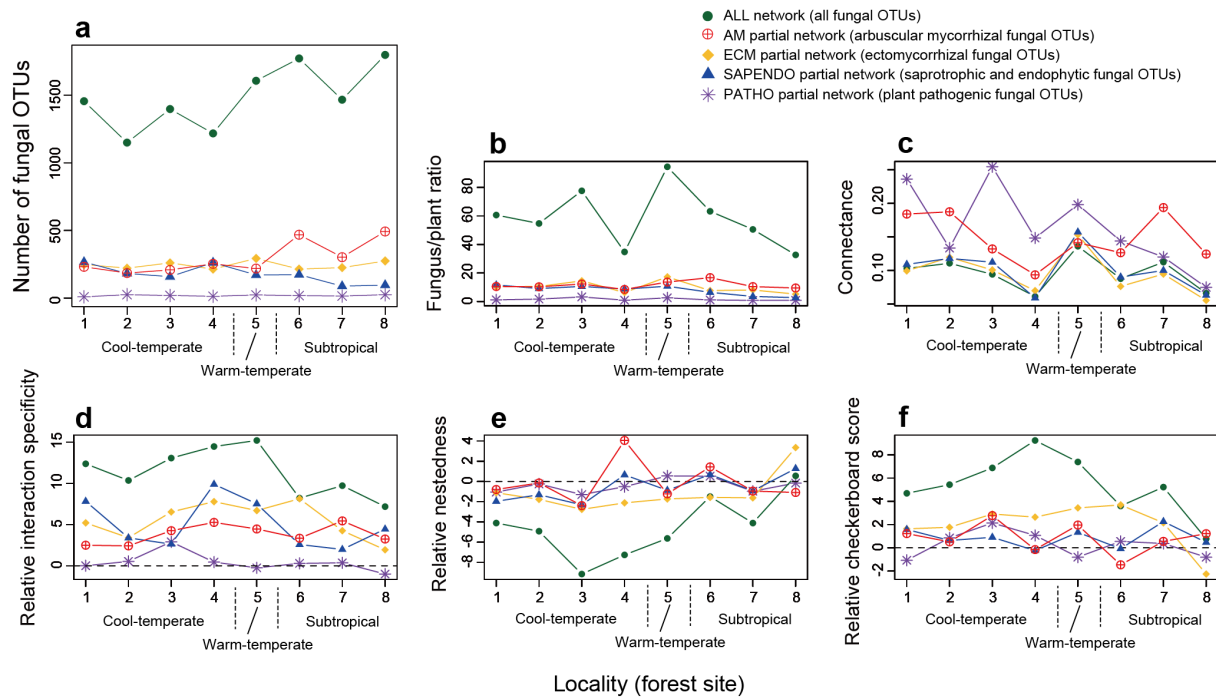

714

715

716 **Fig. 3** Network properties. The index scores representing the architecture of plant fungus  
 717 networks/partial networks are shown across the eight forests examined. **a** The number of  
 718 fungal OTUs. The code numbers of forest sites correspond to those shown in Figure 1. **b** The  
 719 ratio of the number of fungal OTUs to that of the plant species/taxa involved in each  
 720 network/partial network. **c** Connectance (the proportion of non-zero entries in a species-level  
 721 matrix). **d** Network-level interaction specificity (relative  $H_2'$ ). **e** Nestedness (relative weighted  
 722 NODF nestedness). **f** Host range differentiation (relative checkerboard score). For relative  
 723 interaction specificity, relative nestedness, and relative checkerboard score (**d-f**), scores  
 724 higher/lower than 2 roughly indicate that observed network index values are higher/lower  
 725 than expected by chance (see Additional file 7: Data S7 for detailed results of the  
 726 randomization test).  
 727

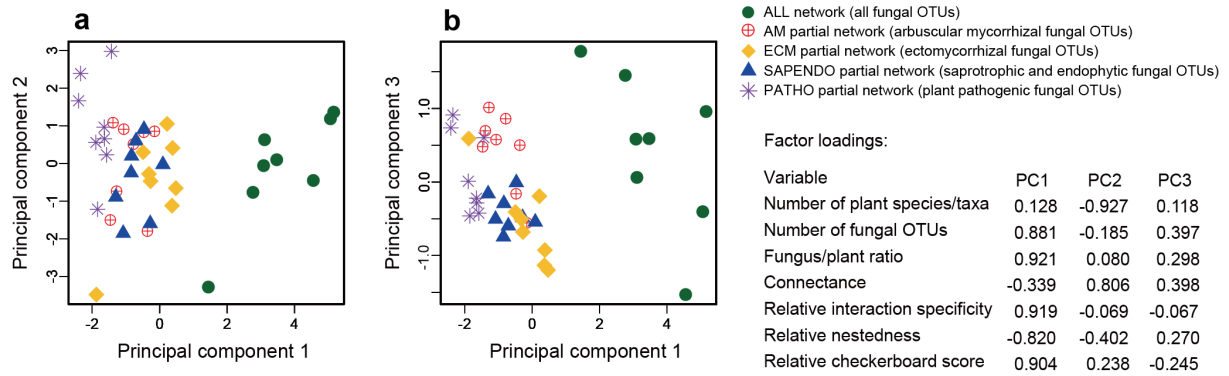

728

729

730 **Fig. 4** Principal component analysis of network properties. **a** Principal component 1 vs.  
 731 principal component 2. Factor loadings of the examined variables are shown on the right. **b**  
 732 Principal component 1 vs. principal component 3.

733

734
